# Supplementary material
Source: publisher figshare collection journal article supplement (https://karger.figshare.com/ndownloader/files/17220182)
Supplement: Supplementary file 1 [file 17220182]

**SUPPLEMENTARY MATERIAL 2**

Table

Heading: Illustrating the effect sizes for the linear mixed model investigating the effects of social context (*aggressive* and *neutral*) and response (*Yes* and *No*) on the mean peak frequency of all vocalizations used in a social context.

| **Fixed effects** |  |  |  |  |  |
| --- | --- | --- | --- | --- | --- |
|  | **Estimate** | **Standard Error** | **Confidence Interval** | **df** | **P-value** |
| *(Intercept)* | *5935.0* | *917.7* | *4136.5 – 7733.6* |  | *0.001* |
| social context | -1707.9 | 630.9 | -2944.5 – -471.3 | 1 | **0.01** |
| response | -672.8 | 671.9 | -1989.6 – 644.1 | 1 | 0.33 |

Table

Heading: Model selection process. As model 1 was not significantly different to either model 2 or model three we chose model 2 based on AIC as the appropriate model for the data.

| model 1: | OVERpeak ~ social * response + (1 | type) | | | | | | |
| --- | --- | --- | --- | --- | --- | --- | --- |
| model 2: | OVERpeak ~ social + response + (1 | type) | | | | | | |
| model 3: | OVERpeak ~ 1 + (1 | type) | | | | | | |
| **model comparisons via anova() function:** | | | | | | | |
| **Model** | **Df** | **AIC** | **BIC** | **logLik** | **deviance** | **Chisq** | **p** |
| *model 2* | 6 | 1289.7 | 1303.2 | -638.87 | 1277.7 |  |  |
| *model 1* | 8 | 1293.3 | 1311.3 | -638.66 | 1277.3 | 0.4231 | 0.8093 |
|  |  |  |  |  |  |  |  |
| *model 3* | 3 | 1292.7 | 1299.5 | -643.36 | 1286.7 |  |  |
| *model 1* | 8 | 1293.3 | 1311.3 | -638.66 | 1277.3 | 9.4073 | 0.0938 |
|  |  |  |  |  |  |  |  |
| *model 3* | 3 | 1292.7 | 1299.5 | -643.36 | 1286.7 |  |  |
| ***model 2*** | **6** | **1289.7** | **1303.2** | **-638.87** | **1277.7** | **8.9842** | **0.0295*** |
